# Supplementary material for: Ce-Doped Three-Dimensional Ni/Fe LDH Composite as a Sulfur Host for Lithium–Sulfur Batteries
Source: MDPI journal article supplement (doi:10.3390/nano13152244), 2023-08-03
Supplement: s1 [file s1]

# **Ce-Doped Three-Dimensional Ni/Fe LDH Composite as a Sulfur Host for Lithium–Sulfur Batteries**

**Huiying Wei, Qicheng Li, Bo Jin \* and Hui Liu**

Key Laboratory of Automobile Materials, Ministry of Education, and School of  
Materials Science and Engineering, Jilin University, Changchun 130022, China;  
weihy22@mails.jlu.edu.cn (H.W.); liqc20@mails.jlu.edu.cn (Q.L.);  
liuhui20@mails.jlu.edu.cn (H.L.)

\* Correspondence: jinbo@jlu.edu.cn

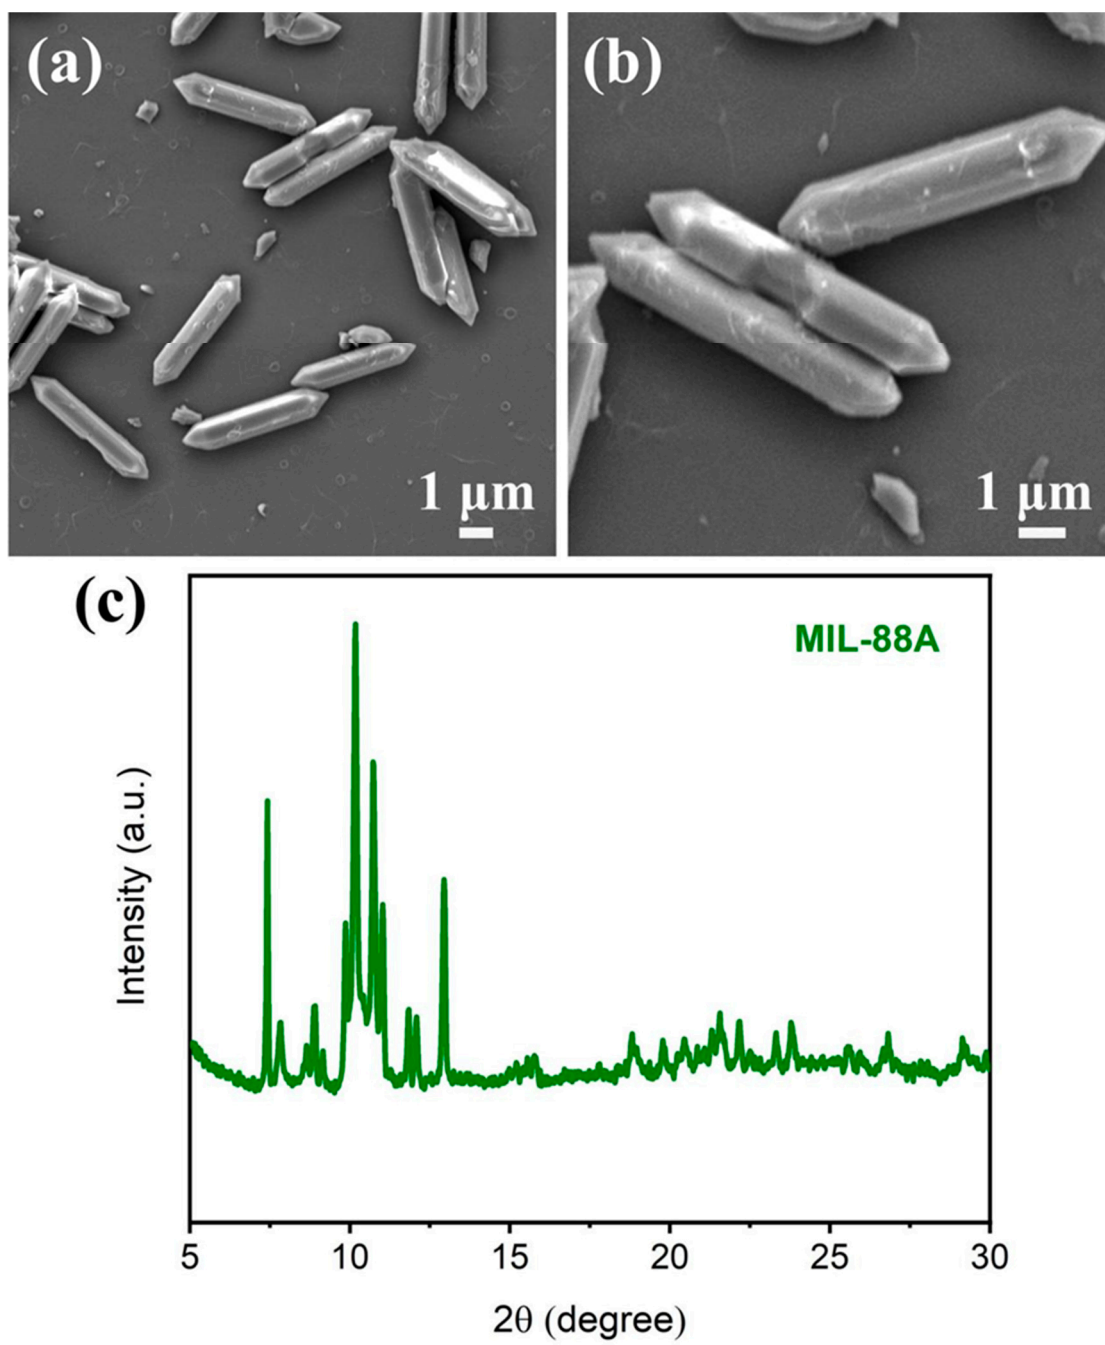

**Figure S1.** (a,b) FESEM images and (c) XRD pattern of MIL-88A precursor.

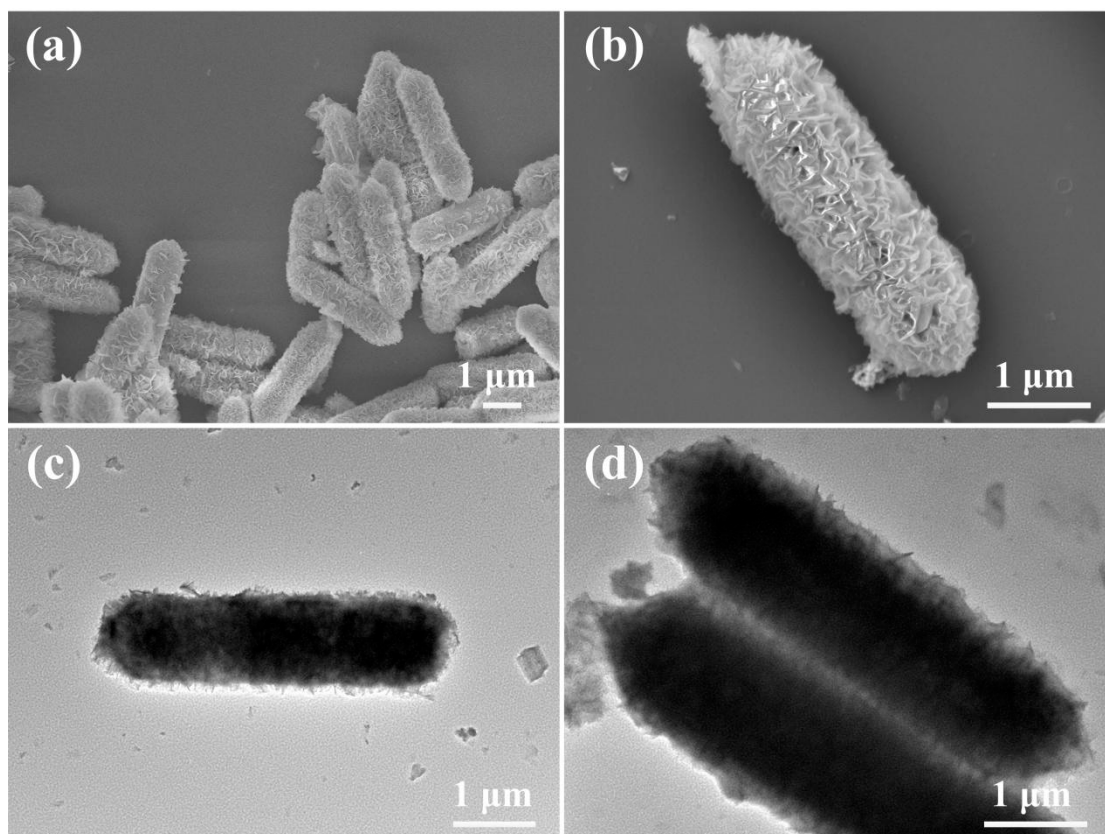

**Figure S2.** (a,b) FESEM images of Ce-Ni/Fe LDH. (c,d) TEM images of Ce-Ni/Fe LDH.

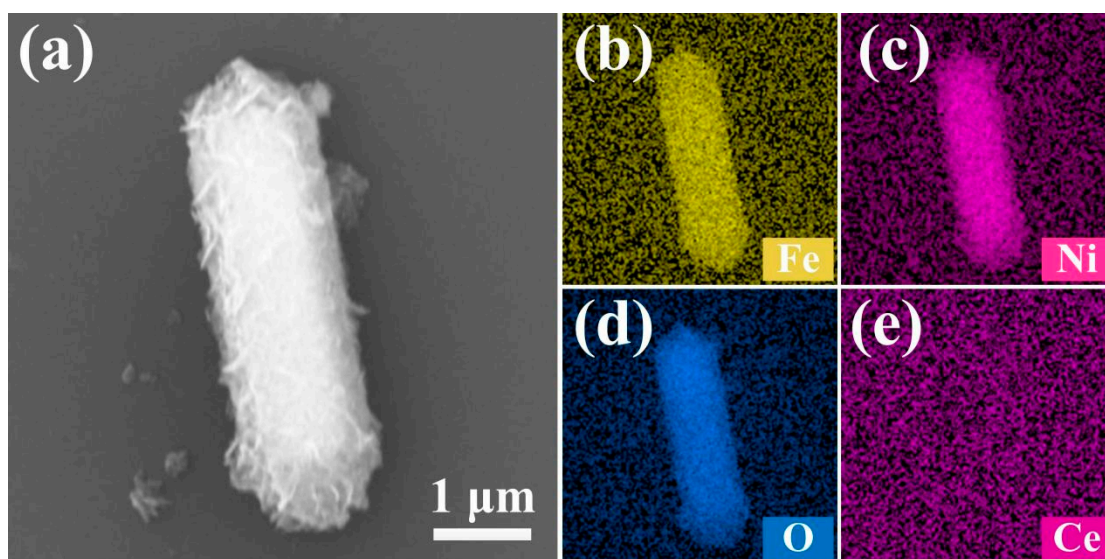

**Figure S3.** (a) SEM image and (b-e) corresponding elemental mappings of Ni/Fe LDH.

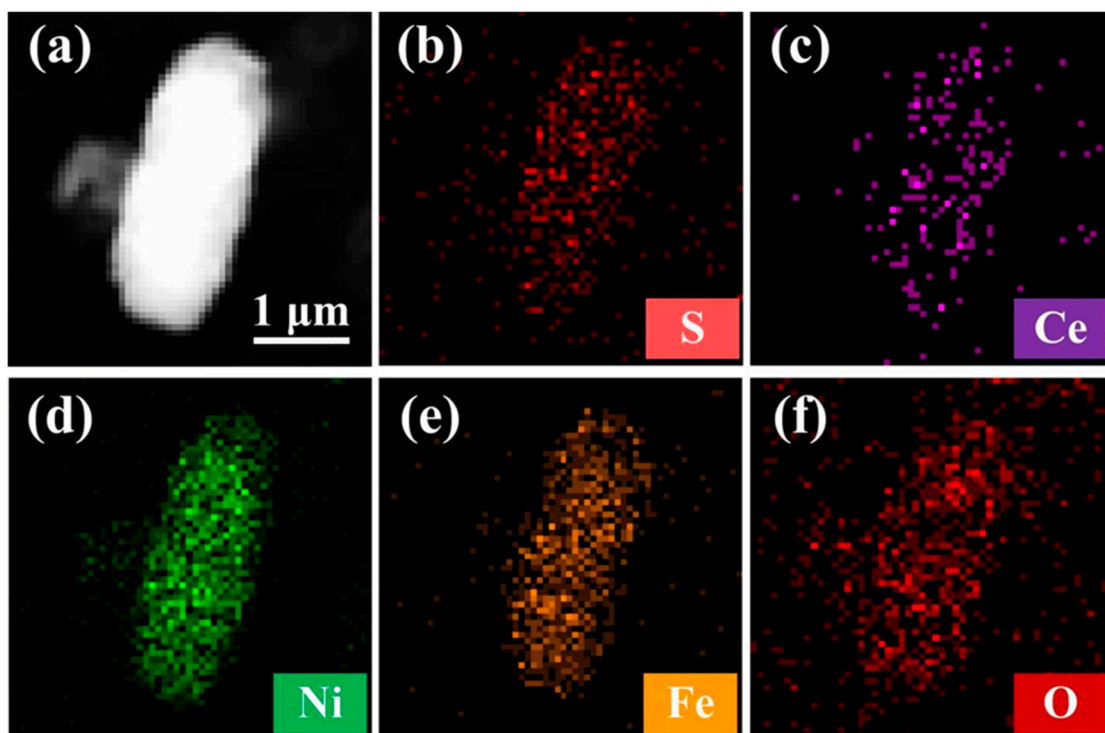

**Figure S4.** (a) STEM image and (b-f) corresponding elemental mappings of S@Ce-Ni/Fe LDH.

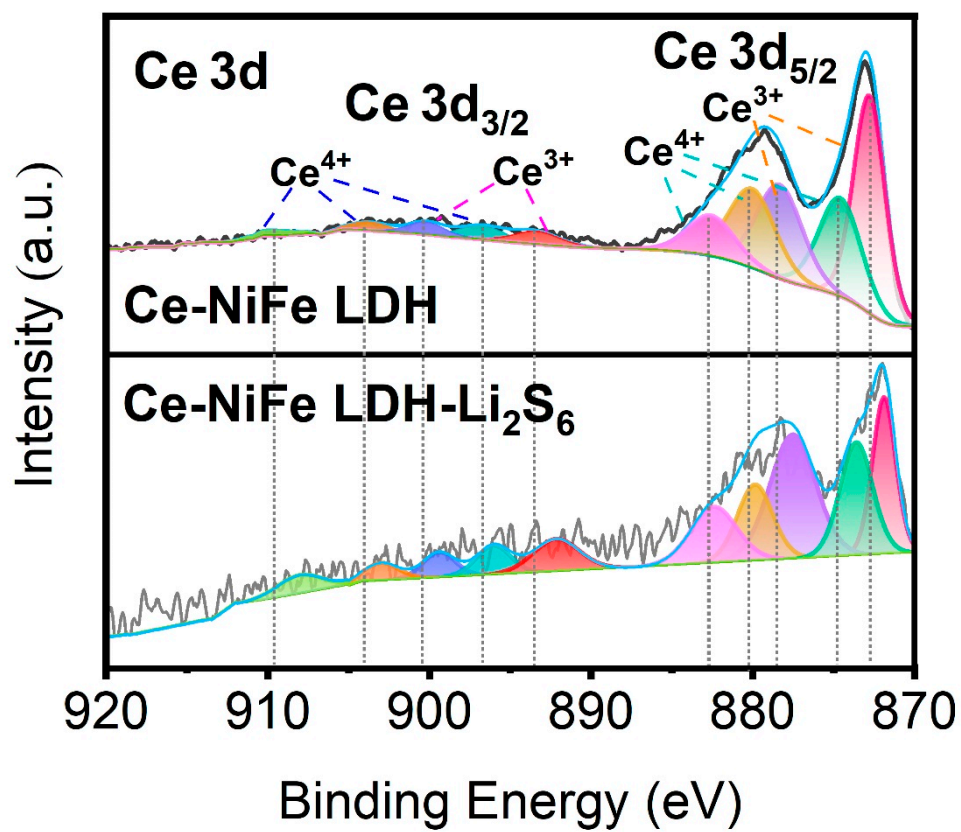

**Figure S5.** Ce 3d high-resolution XPS spectra of Ce-NiFe LDH and Ce-NiFe LDH- $\text{Li}_2\text{S}_6$ .

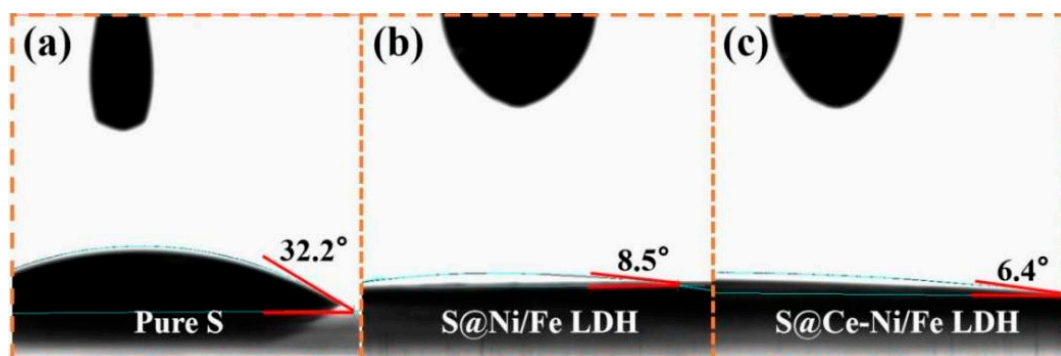

**Figure S6.** Contact angles between electrolyte and (a) pure S or (b) S@Ni/Fe LDH or (c) S@Ce-Ni/Fe LDH.

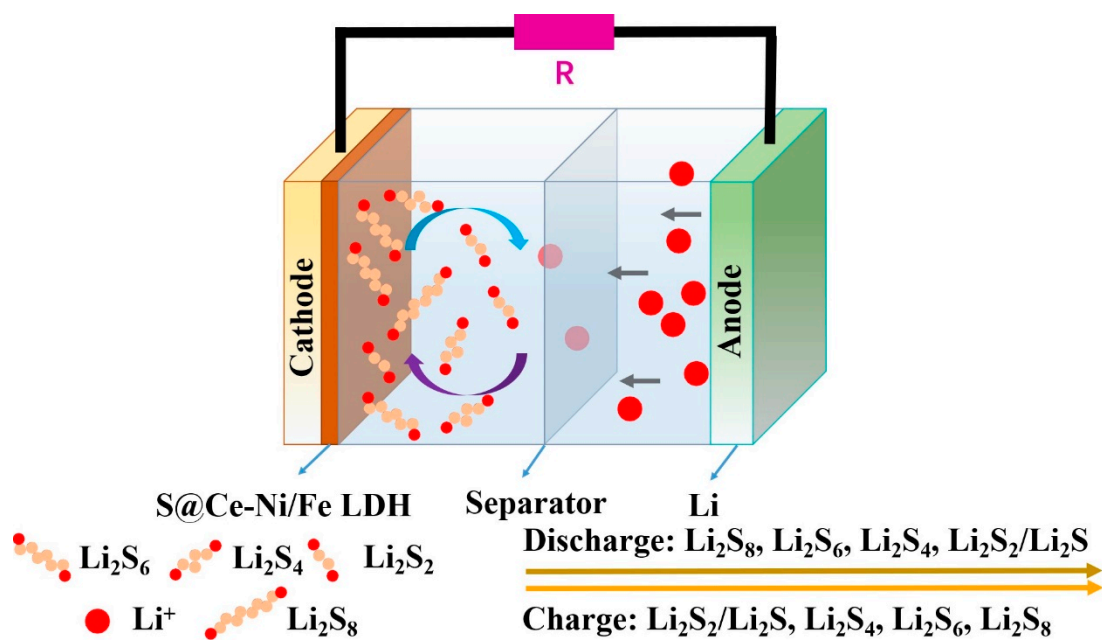

**Figure S7.** Schematic illustration of the redox reaction mechanism of lithium-sulfur battery with S@Ce-Ni/Fe LDH.



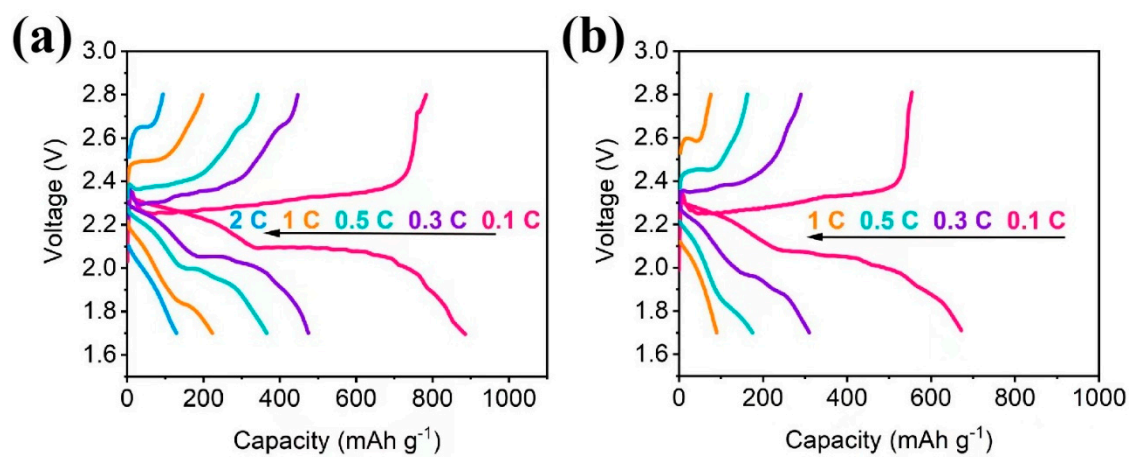

**Figure S8.** Charge/discharge curves of LSBs with (a) S@Ni/Fe LDH and (b) pure S at different current densities.

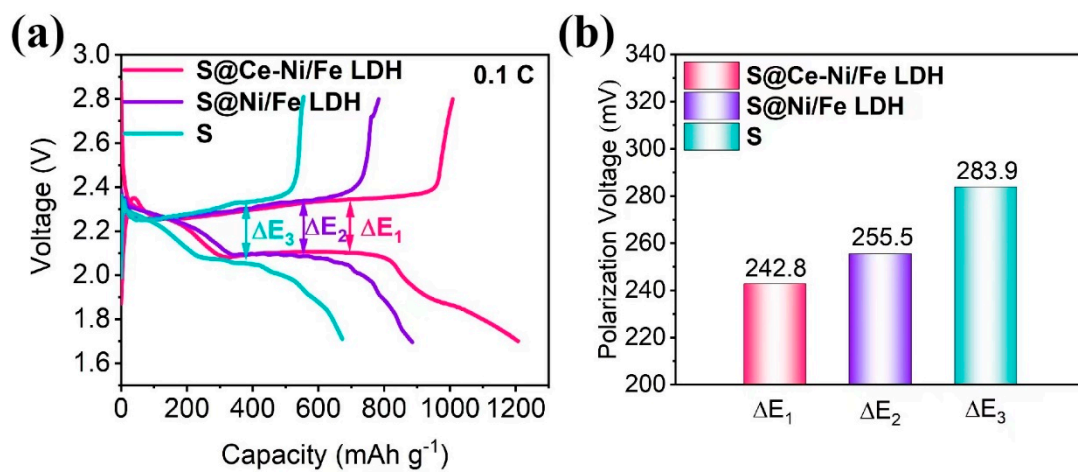

**Figure S9.** (a) The first charge/discharge curves and (b) polarization voltage histograms of LSBs with S@Ce-Ni/Fe LDH, S@Ni/Fe LDH, and pure S at 0.1 C.

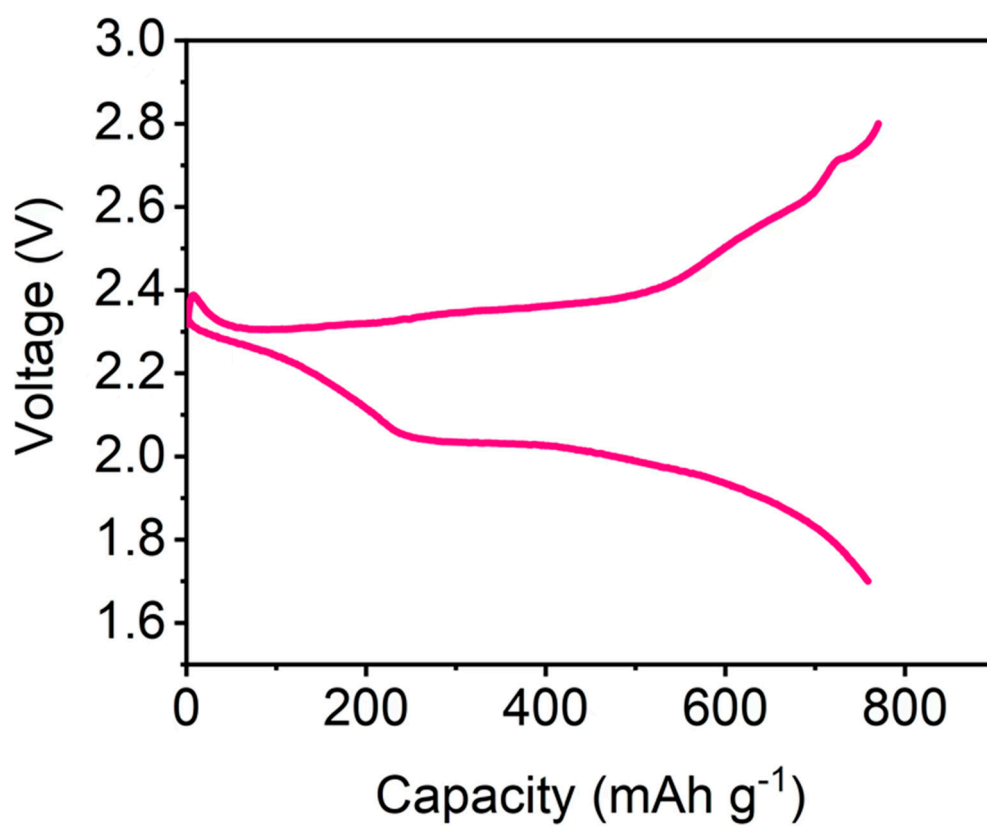

**Figure S10.** The 100th charge/discharge curves of lithium-sulfur battery with S@Ce-Ni/Fe LDH at 0.2 C.

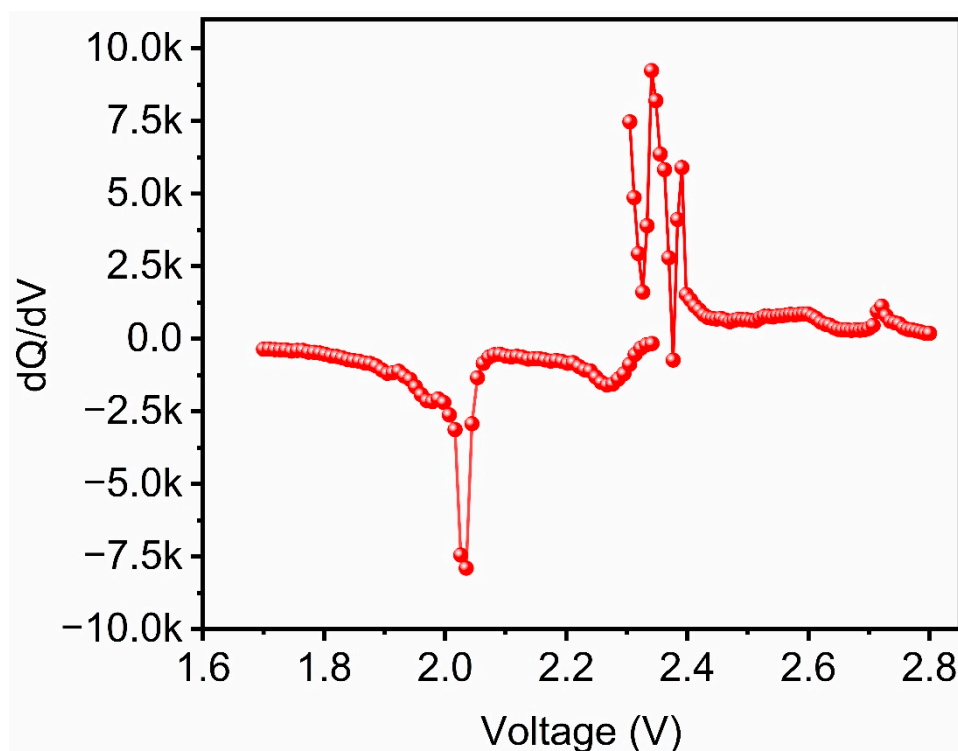

**Figure S11.**  $dQ/dV$  plot of lithium-sulfur battery with S@Ce-Ni/Fe LDH at 0.2 C during the 100th cycle.

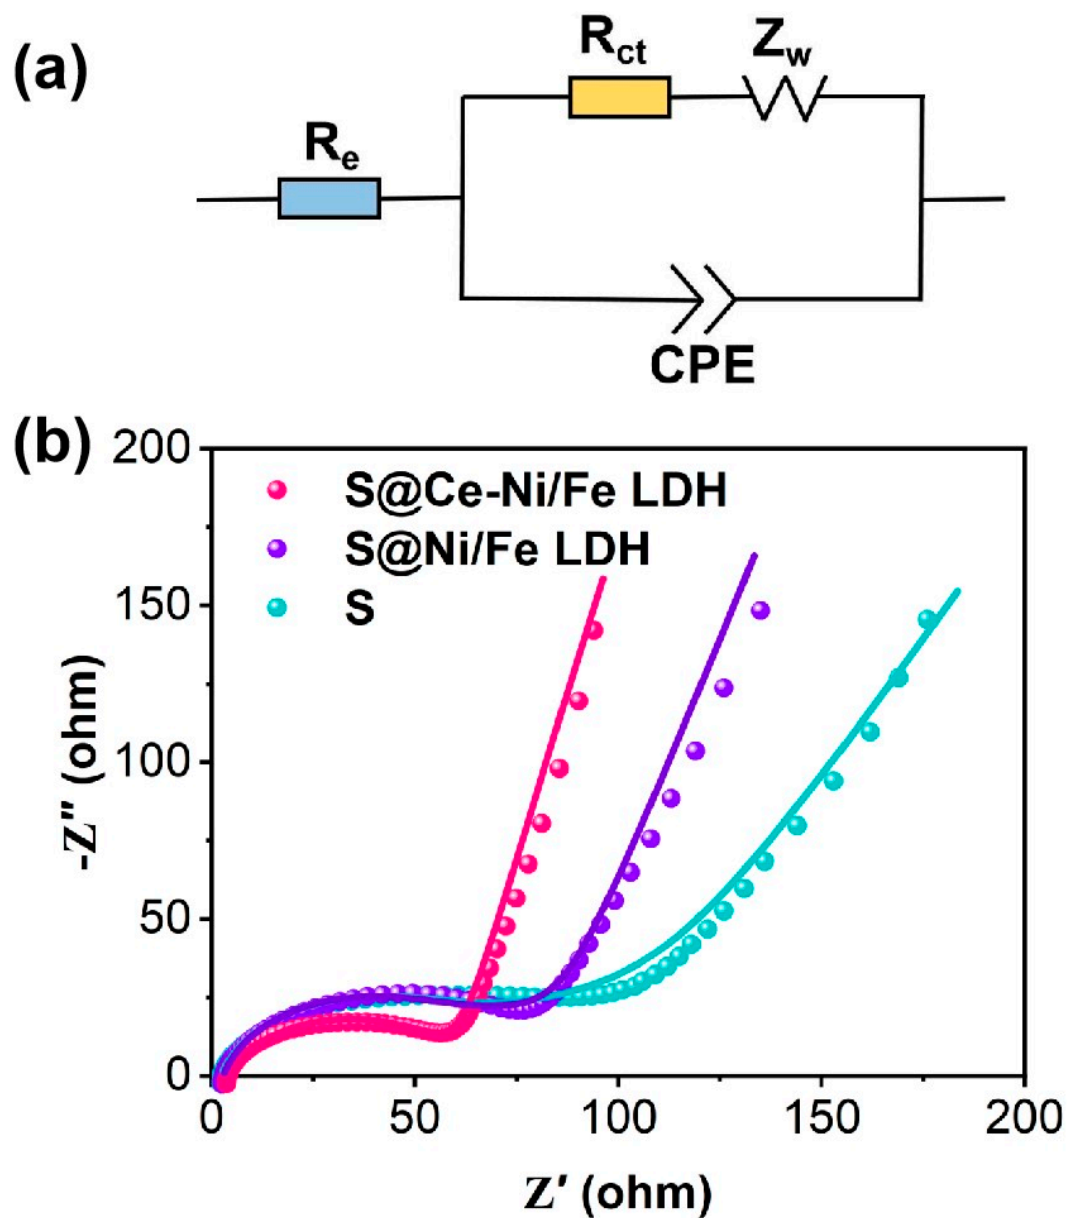

**Figure S12.** (a) The equivalent circuit diagram of LSBs with S@Ce-Ni/Fe LDH, S@Ni/Fe LDH, and pure S before cycling. (b) The fitting of EIS spectra of LSBs with S@Ce-Ni/Fe LDH, S@Ni/Fe LDH, and pure S before cycling.

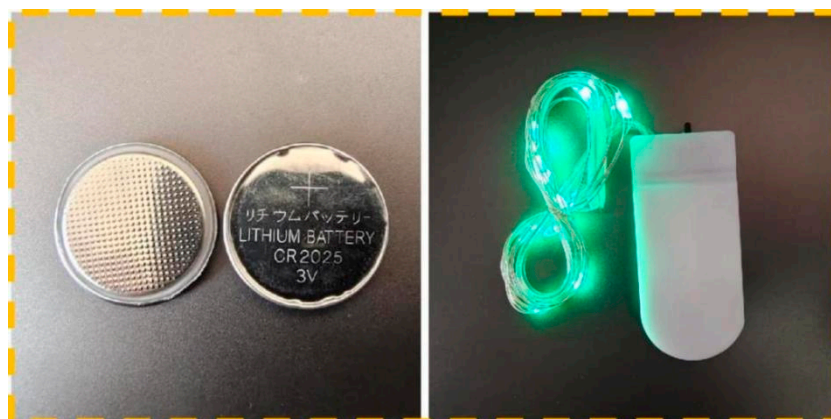

**Figure S13.** Digital photo of a light-emitting diode (LED) green lamp string lit up by two CR2025-type LSBs with S@Ce-Ni/Fe LDH connected in series.

**Table S1.** Comparison of lithium-sulfur batteries with other major battery types.

| Cathode material    | Theoretical capacity (mAh/g) | Work voltage (V) | Characteristic         | Application area                |
|---------------------|------------------------------|------------------|------------------------|---------------------------------|
| <b>Sulfur</b>       | <b>1675</b>                  | <b>2.1</b>       | <b>Capacity decay</b>  | <b>Lithium-sulfur batteries</b> |
| LiFePO <sub>4</sub> | 170                          | 3.2              | Capacity decay         | Lithium-ion batteries           |
| LiCoO <sub>2</sub>  | 274                          | 3.7              | Good cycle performance | Lithium-ion batteries           |

**Table S2.** Comparison of electrochemical performance of lithium-sulfur battery with S@Ce-Ni/Fe LDH with previously reported literatures.

| Sample              | Current density | Cycle number | Discharge capacity (mAh g <sup>-1</sup> ) | Capacity decay rate per cycle (%) | Ref.             |
|---------------------|-----------------|--------------|-------------------------------------------|-----------------------------------|------------------|
| CH@LDH              | 0.5 C           | 100          | 491                                       | 0.342                             | 17               |
| LDH/rGO             | 0.2 C           | 100          | 573                                       | 0.404                             | 23               |
| Co-Fe LDH           | 0.5 C           | 200          | 557                                       | -                                 | 52               |
| NiFe-LDH            | 0.2 C           | 100          | 503                                       | 0.256                             | 53               |
| <b>Ce-Ni/Fe LDH</b> | <b>0.2 C</b>    | <b>100</b>   | <b>759</b>                                | <b>0.28</b>                       | <b>This work</b> |
|                     | <b>1 C</b>      | <b>1000</b>  | <b>308</b>                                | <b>0.067</b>                      |                  |

## References

- 17 Zhang, J.-T.; Hu, H.; Li, Z.; Lou, X.-W. Double-Shelled Nanocages with Cobalt Hydroxide Inner Shell and Layered Double Hydroxides Outer Shell as High-Efficiency Polysulfide Mediator for Lithium-Sulfur Batteries. *Angew. Chem. Int. Edit.* **2016**, 55, 3982-3986.
- 23 Xu, F.-C.; Dong, C.-W.; Jin, B.; Li, H.; Wen, Z.; Jiang, Q. MOF-Derived LDH Wrapped with rGO as an Efficient Sulfur Host for Lithium-Sulfur Batteries. *J. Electroanal. Chem.* **2020**, 876, 114545.
- 51 Wei, H.-J.; Liu, J.; Liu, Y.; Wang, L.; Li, L.-L.; Wang, F.; Ren, X.-Y.; Ren, F.-Z. Hollow Co-Fe LDH as an Effective Adsorption/Catalytic Bifunctional Sulfur Host For High-Performance Lithium-Sulfur Batteries. *Compos. Commun.* **2021**, 28, 100973.



52 Liu, Q.; Zhang, Y.-Q.; Zhou, Y.-B.; Wang, M.; Li, R.-L.; Yue, W.-B. Layered Double Hydroxides Used as the Sulfur Hosts for Lithium-Sulfur Batteries and the Influence of Metal Composition on Their Performance. *J. Solid State Electr.* **2023**, *27*, 797-807.
